# Supplementary material for: CAN OF SPINACH, a novel long non-coding RNA, affects iron deficiency responses in Arabidopsis thaliana
Source: Front Plant Sci. 2022 Oct 5;13:1005020. doi: 10.3389/fpls.2022.1005020 (PMC9581158; doi:10.3389/fpls.2022.1005020)
Supplement: Supplementary file 2 [file Table_2.xlsx]

## Sheet: -Fe Upreg in Shoots
Transcript ID	Fold Change	P-value	Description	Transcript Name	Rapid responding	Previously implicated in Fe-deficiency responses	Resupply-Plus Fold Change	Resupply-Plus P-value
AT3G56970.1	11.2382	3.26535e-43	Encodes a member of the basic helix-loop-helix transcription factor family protein.	BASIC HELIX-LOOP-HELIX 38 (BHLH38)	YES	YES	0.321901	0.771735
AT2G14247.1	9.72385	3.51959e-45	Expressed protein		YES	NO	1.13986	0.178891
AT1G24580.1	8.46763	2.71647e-34	RING/U-box superfamily protein		YES	NO	-0.0815342	0.957021
AT1G12030.1	6.26434	1.38235e-24	phosphoenolpyruvate carboxylase, putative (DUF506)		YES	NO	0.645906	0.659147
AT1G47400.1	5.47635	3.35063e-22	Involved in regulation of iron deficiency response genes. Overexpression results in hyperaccumulation of Fe and Mn.	IRONMAN 1 (IMA1)	YES	YES	-0.456183	0.653877
AT1G47395.1	5.12821	7.2773e-21	Involved in regulation of iron deficiency response genes.	IRONMAN 2 (IMA2)	YES	YES	-0.813401	0.129007
AT1G80840.1	4.47202	4.19267e-84	Pathogen-induced transcription factor. Binds W-box sequences in vitro. Forms protein complexes with itself and with WRKY40 and WRKY60. Coexpression with WRKY18 or WRKY60 made plants more susceptible to both P. syringae and B. cinerea. WRKY18, WRKY40, and WRKY60 have partially redundant roles in response to the hemibiotrophic bacterial pathogen Pseudomonas syringae and the necrotrophic fungal path…	WRKY DNA-BINDING PROTEIN 4NA (WRKY4NA)	YES	NO	0.123674	0.915417
AT3G14050.1	4.31206	2.8648e-66	RELA/SPOT homolog 2	RELA/SPOT HOMOLOG 2 (ATRSH2)	YES	NO	0.276292	0.195126
AT1G43800.1	4.18036	7.59532e-18	Plant stearoyl-acyl-carrier-protein desaturase family protein	ACYL-ACYL CARRIER PROTEIN (ACP) DESATURASE 6 (AAD6)	YES	NO	0.144467	0.925327
AT1G21110.1	4.05076	5.08643e-23	O-methyltransferase family protein	INDOLE GLUCOSINOLATE O-METHYLTRANSFERASE 3 (IGMT3)	YES	NO	-0.955188	0.537668
AT1G62420.1	4.04986	1.58476e-13	DUF506 family protein (DUF506)		YES	NO	-3.61106	0.039748
AT1G56430.1	3.87321	2.28037e-26	Encodes a protein with nicotianamine synthase activity.	NICOTIANAMINE SYNTHASE 4 (NAS4)	YES	YES	-0.175676	0.734672
AT5G67370.1	3.75001	5.03778e-41	DUF1230 family protein (DUF1230)	CONSERVED IN THE GREEN LINEAGE AND DIATOMS 27 (CGLD27)	YES	NO	-0.0672258	0.680319
AT4G12770.2	3.61322	8.47727e-12	Negative regulation of growth and endocytosis, most likely as a result of inhibition of the recruitment of clathrin to endocytic pits.	AUXILIN-LIKE2 (AUXILIN-LIKE2)	YES	NO	3.53253	0.0566226
AT1G03470.2	3.57961	1.72838e-16	Encodes a member of the NET superfamily of proteins that potentially couples different membranes to the actin cytoskeleton in plant cells. It colocalizes with filamentous actin and is localized to the nuclear membrane and the vacuolar membrane.	NETWORKED 3A (NET3A)	YES	NO	-1.80501	0.103625
AT3G18290.1	3.57049	3.20722e-21	Encodes BRUTUS (BTS), a putative E3 ligase protein with metal ion binding and DNA binding domains, which negatively regulates the response to iron deficiency. The mRNA is cell-to-cell mobile.	BRUTUS (BTS)	YES	YES	-0.127219	0.713367
AT1G56150.1	3.56472	1.75221e-23	SAUR-like auxin-responsive protein family	SMALL AUXIN UPREGULATED 71 (SAUR71)	YES	NO	-0.646493	0.564737
AT5G66210.4	3.54485	1.74318e-12	Calcium Dependent Protein Kinase. Functions in the BIK1 innate immune response pathway.	CALCIUM-DEPENDENT PROTEIN KINASE 28 (CPK28)	YES	NO	0.251575	0.884906
AT5G04150.1	3.43498	7.62034e-12	Encodes a member of the basic helix-loop-helix transcription factor family protein. Functions as a key regulator of iron-deficiency responses independent of the master regulator FIT. Likely regulates genes involved in the distribution of iron within the plant.	BASIC HELIX-LOOP-HELIX 101 (BHLH101)	YES	YES	-0.583432	0.602235
AT4G17490.1	3.34675	2.19121e-48	Encodes a member of the ERF (ethylene response factor) subfamily B-3 of ERF/AP2 transcription factor family (ATERF-6). The protein contains one AP2 domain. There are 18 members in this subfamily including ATERF-1, ATERF-2, AND ATERF-5. It is involved in the response to reactive oxygen species and light stress. Involved in regulating root architecture and the response to cold stress.	ETHYLENE RESPONSIVE ELEMENT BINDING FACTOR 6 (ATERF6)	YES	NO	0.297491	0.404128
AT5G53450.1	3.34473	8.26167e-40	OBP3-responsive protein 1	OBP3-RESPONSIVE GENE 1 (ORG1)	YES	NO	0.603788	0.51993
AT1G64980.1	3.32173	1.79357e-19	Encodes a putative nucleotide-diphospho-sugar transferase required for pollen germination and tube growth.	CADMIUM 2+ INDUCED (CDI)	YES	NO	-0.0704193	0.955985
AT2G19590.1	3.30058	9.32593e-15	encodes a protein whose sequence is similar to 1-aminocyclopropane-1-carboxylate oxidase	ACC OXIDASE 1 (ACO1); (ATACO1)	YES	NO	2.29331	0.0818264
AT4G25700.1	3.29667	1.74122e-44	Converts beta-carotene to zeaxanthin via cryptoxanthin.	BETA CAROTENOID HYDROXYLASE 1 (BCH1)	YES	NO	-0.0295374	0.910874
AT5G05250.1	3.25486	1.43305e-19	hypothetical protein		YES	NO	-0.339676	0.548931
AT2G23760.1	3.17701	2.08284e-10	Encodes a member of the BEL family of homeodomain proteins. Plants doubly mutant for saw1/saw2 (blh2/blh4) have serrated leaves. BP is expressed in the serrated leaves, therefore saw2 and saw1 may act redundantly to repress BP in leaves. Regulates together with BLH2 demethylesterification of homogalacturonan in seed mucilage.	BEL1-LIKE HOMEODOMAIN 4 (BLH4);SAWTOOTH 2 (SAW2)	YES	NO	-1.44902	0.30547
AT2G41100.3	3.11135	3.05676e-17	encodes a calmodulin-like protein, with six potential calcium binding domains. Calcium binding shown by Ca(2+)-specific shift in electrophoretic mobility. Expression induced by touch and darkness. Expression may also be developmentally controlled. Expression in growing regions of roots, vascular tissue, root/shoot junctions, trichomes, branch points of the shoot, and regions of siliques and flowe…	CALMODULIN-LIKE 12 (CML12);TOUCH 3 (TCH3);ARABIDOPSIS THALIANA CALMODULIN LIKE 4 (ATCAL4)	YES	NO	0.517045	0.714636
AT2G44840.1	3.0358	2.47986e-12	encodes a member of the ERF (ethylene response factor) subfamily B-3 of ERF/AP2 transcription factor family. The protein contains one AP2 domain. There are 18 members in this subfamily including ATERF-1, ATERF-2, AND ATERF-5. The mRNA is cell-to-cell mobile.	ETHYLENE-RESPONSIVE ELEMENT BINDING FACTOR 13 (ERF13);ETHYLENE-RESPONSIVE ELEMENT BINDING FACTOR 13 (ATERF13); (EREBP)	YES	NO	-0.202071	0.888224
AT5G17350.1	3.0334	9.71561e-15	PADRE protein up-regulated after infection by S. sclerotiorum.		YES	NO	1.00075	0.408055
AT3G47640.1	3.00684	1.208e-22	Encodes POPEYE (PYE), a bHLH transcription factor regulating response to iron deficiency in Arabidopsis roots.	POPEYE (PYE)	YES	YES	-0.14952	0.873106
AT4G16370.1	2.99172	5.08689e-18	Encodes a phloem-specific iron transporter that is essential for systemic iron signaling and redistribution of iron and cadmium. It loads iron into the phloem, facilitates iron recirculation from the xylem to the phloem, and regulates both shoot-to-root iron signaling and iron redistribution from mature to developing tissues.	OLIGOPEPTIDE TRANSPORTER (ATOPT3)	YES	YES	-0.386016	0.205239
AT1G13609.1	2.93454	7.36208e-09	Encodes a defensin-like (DEFL) family protein.	CAN OF SPINACH (COS) lncRNA	YES	YES	0.453175	0.690936
AT5G41740.2	2.84157	3.59319e-08	Disease resistance protein (TIR-NBS-LRR class) family		YES	NO	-0.926941	0.536732
AT5G67330.1	2.72941	2.92932e-23	Encodes a member of the Nramp2 metal transporter family; like its homolog Atnramp3, localized in vacuolar membrane. Seedlings of double mutant, atnramp3-1 atnramp4-1, were arrested at early germination. The mRNA is cell-to-cell mobile.	NATURAL RESISTANCE ASSOCIATED MACROPHAGE PROTEIN 4 (NRAMP4);ARABIDOPSIS THALIANA NATURAL RESISTANCE ASSOCIATED MACROPHAGE PROTEIN 4 (ATNRAMP4)	YES	YES	-0.290855	0.223849
AT3G08990.1	2.71538	1.28578e-07	Yippee family putative zinc-binding protein		YES	NO	0.611778	0.711295
AT3G01350.1	2.7091	4.27046e-18	Major facilitator superfamily protein		YES	NO	0.463566	0.752587
AT3G15356.1	2.70509	7.66412e-11	Legume lectin family protein		YES	NO	0.302961	0.436292
AT2G30766.2	2.69061	1.64264e-10	Functions in iron homeostasis, activates iron deficiency response genes such as bHLH38, bHLH39, IRT1, and FRO2.	IRONMAN 3 (IMA3)	YES	YES	-0.509817	0.483104
AT1G27730.1	2.65204	1.52673e-12	Related to Cys2/His2-type zinc-finger proteins found in higher plants. Compensated for a subset of calcineurin deficiency in yeast. Salt tolerance produced by ZAT10 appeared to be partially dependent on ENA1/PMR2, a P-type ATPase required for Li+ and Na+ efflux in yeast. The protein is localized to the nucleus, acts as a transcriptional repressor and is responsive to chitin oligomers. Also involv…	(ZAT1NA);SALT TOLERANCE ZINC FINGER (STZ)	YES	NO	0.274051	0.471437
AT1G74770.1	2.64782	5.48414e-08	zinc ion binding protein	BRUTUS LIKE 1 (BTSL1)	YES	YES	-0.589832	0.70065
AT5G13740.1	2.64286	3.64829e-15	Encodes ZIF1 (ZINC-INDUCED FACILITATOR1), a member of the Major Facilitator Superfamily (MFS) of membrane proteins which are found in all organisms and transport a wide range of small, organic molecules. Involved in a mechanism of Zn sequestration, possibly by transport of a Zn ligand or Zn-ligand complex into vacuoles. The mRNA is cell-to-cell mobile.	ZINC INDUCED FACILITATOR 1 (ZIF1)	YES	YES	0.0898885	0.718413
AT5G25830.1	2.64129	1.81369e-15	Encodes a member of the GATA factor family of zinc finger transcription factors.	GATA TRANSCRIPTION FACTOR 12 (GATA12)	YES	NO	0.232474	0.656509
AT3G46090.1	2.59998	4.15074e-09	C2H2 and C2HC zinc fingers superfamily protein	(ZAT7)	YES	NO	1.25745	0.260491
AT5G45340.1	2.59921	5.28506e-11	Encodes a protein with ABA 8'-hydroxylase activity; involved in ABA catabolism. Mutant analyses show that disruption in the gene results in more drought tolerance whereas overexpression results in increased transpiration rate and reduced drought tolerance. Gene involved in postgermination growth. Plant P450 CYP707A3, ABA 8'-hydroxylase, binds enantioselectively (+)-ABA but not (-)-ABA, whereas th…	CYTOCHROME P45NA, FAMILY 7NA7, SUBFAMILY A, POLYPEPTIDE 3 (CYP7NA7A3)	YES	NO	-0.641527	0.624418
AT1G33760.1	2.5635	5.36321e-08	encodes a member of the DREB subfamily A-4 of ERF/AP2 transcription factor family. The protein contains one AP2 domain. There are 17 members in this subfamily including TINY.	ETHYLENE RESPONSE FACTORNA22 (ERFNA22)	YES	NO	-0.220705	0.871288
AT5G64940.2	2.53974	1.21586e-07	ABC1K8 is a member of an atypical protein kinase family that is induced by heavy metals. Loss of function mutations affect the metabolic profile of chloroplast lipids. It appears to function along with ABC1K7 in mediating lipid membrane changes in response to stress. The mRNA is cell-to-cell mobile.	(ABC1K8);ARABIDOPSIS THALIANA ABC2 HOMOLOG 13 (ATATH13);ABC2 HOMOLOG 13 (ATH13)	YES	NO	-0.730986	0.580214
AT4G30290.1	2.5373	1.5195e-07	Encodes a xyloglucan endotransglucosylase/hydrolase with only only the endotransglucosylase (XET; EC 2.4.1.207) activity towards xyloglucan and non-detectable endohydrolytic (XEH; EC 3.2.1.151) activity. Expressed throughout both the main and the lateral root, with intensive expression at the dividing and elongating regions. Is expressed in lateral root primordia but expression ceases after later…	XYLOGLUCAN ENDOTRANSGLUCOSYLASE/HYDROLASE 19 (ATXTH19)	YES	NO	-1.25823	0.45989
AT2G42750.1	2.52859	6.36237e-30	DNAJ heat shock N-terminal domain-containing protein	DNA J PROTEIN C77 (DJC77)	YES	NO	0.140231	0.503534
AT5G45340.2	2.51362	1.151e-06	Encodes a protein with ABA 8'-hydroxylase activity; involved in ABA catabolism. Mutant analyses show that disruption in the gene results in more drought tolerance whereas overexpression results in increased transpiration rate and reduced drought tolerance. Gene involved in postgermination growth. Plant P450 CYP707A3, ABA 8'-hydroxylase, binds enantioselectively (+)-ABA but not (-)-ABA, whereas th…	CYTOCHROME P45NA, FAMILY 7NA7, SUBFAMILY A, POLYPEPTIDE 3 (CYP7NA7A3)	YES	NO	0.0548734	0.97064
AT1G66090.1	2.51035	1.13443e-10	Disease resistance protein (TIR-NBS class)	TIR-NBS3, TN3	YES	NO	0.478562	0.642035
AT1G12520.3	2.491	8.05847e-08	Copper-zinc superoxide dismutase copper chaperone (delivers copper to the Cu-Zn superoxide dismutase). Localized to the chloroplast. Expressed in roots and shoots. Up-regulated in response to copper and senescence. The AtACC activates all three CuZnSOD activities located in three different subcellular compartments. Contains three domains, central, ATX-1 like and C-terminal. ATX-1 like domain esse…	COPPER CHAPERONE FOR SOD1 (ATCCS);COPPER CHAPERONE FOR SOD1 (CCS)	YES	NO	-4.6383	0.046198
AT5G52050.1	2.46211	9.05731e-10	MATE efflux family protein	DETOXIFICATION EFFLUX CARRIER 5NA (DTX5NA); (ATDTX5NA)	YES	NO	0.672775	0.316818
AT4G10270.1	2.46191	5.33182e-13	Member of the wound-induced polypeptide (WIP) family.	WOUND-INDUCED POLYPEPTIDE 4 (WIP4)	YES	NO	-0.0883912	0.945409
AT1G07135.1	2.43957	4.13348e-17	glycine-rich protein		YES	NO	-0.0353629	0.862822
AT2G41240.1	2.43528	5.95235e-07	Encodes a member of the basic helix-loop-helix transcription factor family protein. Functions as a key regulator of iron-deficiency responses independent of the master regulator FIT. Likely regulates genes involved in the distribution of iron within the plant.	BASIC HELIX-LOOP-HELIX PROTEIN 100 isoform	YES	YES	1.345	0.208536
AT5G04340.1	2.43036	1.34971e-12	Encodes a C2H2 zinc finger transcription factor that coordinately activates phytochelatin-synthesis related gene expression and directly targets GSH1 by binding to its promoter to positively regulate Cd accumulation and tolerance.	ZINC FINGER OF ARABIDOPSIS THALIANA 6 (ZAT6)	YES	NO	0.0330357	0.962306
AT1G58225.1	2.40907	2.16277e-06	hypothetical protein		YES	NO	-2.57258	0.0754396
AT1G07500.1	2.39075	4.0184e-06	SMR5 is a member of the SIAMESE-RELATED Cyclin-Dependent Kinase Inhibitor family. It is induced by ROS/oxidative stress.	SIAMESE-RELATED 5 (SMR5)	YES	NO	2.30056	0.0609279
AT3G16360.2	2.36288	2.70225e-11	Encodes AHP4, a histidine-containing phosphotransmitter involved in Histidine (His)-to-Aspartate (Asp) phosphorelay signal transduction. AHP4 is one of the six Arabidopsis thaliana histidine phosphotransfer proteins (AHPs). AHPs function as redundant positive regulators of cytokinin signaling. Members of the AHP gene family include: AT3G21510 (AHP1), AT3G29350 (AHP2), AT5G39340 (AHP3), AT3G16360 …	HPT PHOSPHOTRANSMITTER 4 (AHP4)	YES	NO	-4.506	0.0325423
AT1G03990.1	2.36113	1.28125e-12	Long-chain fatty alcohol dehydrogenase family protein		YES	NO	0.454601	0.659673
AT5G28630.1	2.34516	2.0159e-06	glycine-rich protein		YES	NO	0.781857	0.0777097
AT3G44260.1	2.33687	3.81991e-08	Encodes one of the homologs of the yeast CCR4-associated factor 1: AT3G44260 (CAF1a), AT5G22250 (CAF1b). Has mRNA deadenylation activity. Also plays a role in plant defense responses.	CCR4- ASSOCIATED FACTOR 1A (CAF1a);CCR4- ASSOCIATED FACTOR 1A (AtCAF1a)	YES	NO	0.171861	0.473938
AT4G02520.1	2.33537	5.97592e-11	Encodes glutathione transferase belonging to the phi class of GSTs. Naming convention according to Wagner et al. (2002). The expression of this gene is upregulated by herbicide safeners such as benoxacor and fenclorim.	GLUTATHIONE S-TRANSFERASE PHI 2 (GSTF2); (GST2); (ATPM24); (ATPM24.1);GLUTATHIONE S-TRANSFERASE PHI 2 (ATGSTF2)	YES	NO	0.339887	0.0866514
AT2G30766.1	2.32825	8.24907e-06	Functions in iron homeostasis, activates iron deficiency response genes such as bHLH38, bHLH39, IRT1, and FRO2.	IRONMAN 3 (IMA3)	YES	YES	-0.580041	0.256197
AT2G38470.1	2.31255	1.10786e-23	Member of the plant WRKY transcription factor family. Regulates the antagonistic relationship between defense pathways mediating responses to P. syringae and necrotrophic fungal pathogens. Located in nucleus. Involved in response to various abiotic stresses - especially salt stress.	WRKY DNA-BINDING PROTEIN 33 (WRKY33);WRKY DNA-BINDING PROTEIN 33 (ATWRKY33)	YES	NO	0.157144	0.555787
AT1G72940.1	2.30704	2.12628e-11	Toll-Interleukin-Resistance (TIR) domain-containing protein	TIR-NBS11, TN11	YES	NO	0.0208827	0.956416
AT2G44790.1	2.30258	1.43423e-06	Encodes a uclacyanin, a protein precursor that is closely related to precursors of stellacyanins and a blue copper protein from pea pods.	UCLACYANIN 2 (UCC2)	YES	NO	0.555902	0.651835
AT5G41740.1	2.28641	3.22043e-26	Disease resistance protein (TIR-NBS-LRR class) family		YES	NO	-0.169087	0.91886
AT1G01060.4	2.27972	1.41388e-10	LHY encodes a myb-related putative transcription factor involved in circadian rhythm along with another myb transcription factor CCA1	LATE ELONGATED HYPOCOTYL (LHY);LATE ELONGATED HYPOCOTYL 1 (LHY1)	YES	NO	-2.19077	0.207382
AT1G03470.1	2.26651	4.6235e-06	Encodes a member of the NET superfamily of proteins that potentially couples different membranes to the actin cytoskeleton in plant cells. It colocalizes with filamentous actin and is localized to the nuclear membrane and the vacuolar membrane.	NETWORKED 3A (NET3A)	YES	NO	-0.453053	0.410162
AT4G24570.1	2.26395	1.77054e-08	Encodes one of the mitochondrial dicarboxylate carriers (DIC): DIC1 (AT2G22500), DIC2 (AT4G24570), DIC3 (AT5G09470). The mRNA is cell-to-cell mobile.	DICARBOXYLATE CARRIER 2 (DIC2);PLANT UNCOUPLING MITOCHONDRIAL PROTEIN 4 (UCP4)	YES	NO	-0.16499	0.549263
AT1G61340.1	2.23347	3.33636e-07	Encodes a F-box protein induced by various biotic or abiotic stress.	(ATFBS1);F-BOX STRESS INDUCED 1 (FBS1)	YES	NO	0.106836	0.948133
AT2G26530.1	2.22279	1.16746e-28	Pheromone receptor-like protein involved in the early elicitor signaling events which occur within minutes and include ion fluxes across the plasma membrane, activation of MPKs and the formation of ROS related to PGPS1 and WRKY33.	(AR781)	YES	NO	-0.0187893	0.951809
AT1G72920.1	2.21859	5.65041e-06	Toll-Interleukin-Resistance (TIR) domain family protein	TIR-NBS9, TN9	YES	NO	-0.546193	0.564948
AT5G39120.1	2.2057	3.00105e-05	RmlC-like cupins superfamily protein		YES	NO	-1.80501	0.103625
AT3G50930.1	2.19278	1.20794e-10	Encodes a protein that is present in a homo-multimeric protein complex on the outer mitochondrial membrane and plays a role in cell death and amplifying salicylic acid signalling. The mRNA is cell-to-cell mobile.	CYTOCHROME BC1 SYNTHESIS (BCS1);OUTER MITOCHONDRIAL MEMBRANE PROTEIN OF 66 KDA (OM66); (ATOM66); (ATBCS1)	YES	NO	-0.734908	0.124561
AT5G15120.1	2.18677	2.71676e-09	2-aminoethanethiol dioxygenase, putative (DUF1637)	PLANT CYSTEINE OXIDASE 1 (PCO1)	YES	NO	-1.42572	0.384198
AT1G74450.1	2.17708	8.08771e-08	Plants overexpressing At1g74450 are stunted in height and have reduced male fertility.	ROH1D	YES	NO	0.678657	0.0796536
AT5G13890.2	2.17308	4.18966e-05	plant viral-response family protein (DUF716)		YES	NO	0.14683	0.666293
AT2G39650.1	2.17187	3.84918e-10	DUF506 gene family member		YES	NO	2.74307	0.0713022
AT3G10040.1	2.17112	5.17058e-12	Encodes HRA1 (HYPOXIA RESPONSE ATTENUATOR1), a low oxygen-inducible transcription factor.	HYPOXIA RESPONSE ATTENUATOR1 (HRA1)	YES	NO	0.215896	0.611479
AT3G55980.1	2.1697	2.2958e-15	salt-inducible zinc finger 1	TANDEM ZINC FINGER 11 (TZF11); (ATSZF1);SALT-INDUCIBLE ZINC FINGER 1 (SZF1)	YES	NO	0.115011	0.523668
AT3G17609.3	2.15815	2.55252e-05	Encodes a homolog of HY5 (HYH). Involved in phyB signaling pathway.	HY5-HOMOLOG (HYH)	YES	NO	1.04841	0.42982
AT1G65390.1	2.15572	5.05482e-05	Phloem Protein2 family gene encoding a two-domain protein containing predicted lectin and Toll/Interleukin-1 receptor domains, which is induced upon spider mite attack and improves the ability to defend against T. urticae by participating in the tight regulation of hormonal cross talk upon mite feeding.	PHLOEM PROTEIN 2 A5 (PP2-A5);PHLOEM PROTEIN 2 A5 (ATPP2-A5)	YES	NO	-0.980536	0.543612
AT5G07440.3	2.15111	2.78509e-05	Encodes the alpha-subunit of the glutamate dehydrogenase. The enzyme is almost exclusively found in the mitochondria of stem and leaf companion cells.	GLUTAMATE DEHYDROGENASE 2 (GDH2)	YES	NO	0.145672	0.845966
AT3G27060.1	2.1501	3.01195e-20	Encodes one of the 3 ribonucleotide reductase (RNR) small subunit genes. TSO2 transcription occurs predominantly at the S-phase of the cell cycle and its expression pattern is consistent with its role in dNDP biosynthesis during DNA replication in actively dividing cells. Critical for cell cycle progression, DNA damage repair and plant development.	(ATTSO2);TSO MEANING 'UGLY' IN CHINESE 2 (TSO2)	YES	NO	-0.207324	0.147775
AT2G18210.1	2.14751	1.42822e-05	hypothetical protein		YES	NO	-0.556127	0.681918
AT3G25730.1	2.14223	4.86442e-05	ethylene response DNA binding factor 3	ETHYLENE RESPONSE DNA BINDING FACTOR 3 (EDF3)	YES	NO	0.17693	0.889669
AT5G36880.1	2.13091	5.9632e-05	Encodes a plastidic acetyl-coA synthetase. This enzyme plays a role in converting acetate to acetyl-coA in the plastids. It does not appear to be a major contributor to fatty acid biosynthesis based on mutant phenotypes. The enzyme seems to act as a monomer and may play an important role in preventing the toxic accumulation of fermentation products including acetaldehyde, acetate, and ethanol. It…	ACETYL-COA SYNTHETASE (ACS)	YES	NO	0.668373	0.52201
AT5G47230.1	2.12579	4.3408e-05	encodes a member of the ERF (ethylene response factor) subfamily B-3 of ERF/AP2 transcription factor family (ATERF-5). The protein contains one AP2 domain. There are 18 members in this subfamily including ATERF-1, ATERF-2, AND ATERF-5. The mRNA is cell-to-cell mobile.	(ATMACD1); (ERF1NA2);ETHYLENE RESPONSIVE ELEMENT BINDING FACTOR 5 (ERF5);ETHYLENE RESPONSIVE ELEMENT BINDING FACTOR- 5 (ATERF-5);ETHYLENE RESPONSIVE ELEMENT BINDING FACTOR 5 (ATERF5)	YES	NO	0.407193	0.624487
AT4G25470.1	2.11438	1.89614e-06	Encodes a member of the DREB subfamily A-1 of ERF/AP2 transcription factor family (CBF2). The protein contains one AP2 domain. There are six members in this subfamily, including CBF1, CBF2, and CBF3. This gene is involved in response to low temperature, abscisic acid, and circadian rhythm. Overexpressing this gene leads to increased freeze tolerance and induces the expression level of 85 cold-ind…	(ATCBF2);FREEZING TOLERANCE QTL 4 (FTQ4);DRE/CRT-BINDING PROTEIN 1C (DREB1C);C-REPEAT/DRE BINDING FACTOR 2 (CBF2)	YES	NO	0.883356	0.235764
AT2G40140.1	2.1143	5.56059e-06	zinc finger (CCCH-type) family protein	TANDEM ZINC FINGER 1NA (TZF1NA); (ATSZF2); (CZF1); (ZFAR1);(SALT-INDUCIBLE ZINC FINGER 2 (SZF2)	YES	NO	-0.216577	0.30561
AT1G70260.1	2.11155	6.66361e-06	Encodes an endoplasmic reticulum (ER)-localized nodulin MtN21-like transporter family protein that negatively regulates resistance against biotrophic pathogens but not the necrotrophic pathogen, B. cinerea, possibly by regulating ROS production, cell death and PR1 expression.	USUALLY MULTIPLE ACIDS MOVE IN AND OUT TRANSPORTERS 36 (UMAMIT36);RESISTANCE TO PHYTOPHTHORA PARASITICA 1 (RTP1)	YES	NO	-0.199108	0.902764
AT5G55450.1	2.09153	2.90286e-06	Bifunctional inhibitor/lipid-transfer protein/seed storage 2S albumin superfamily protein	(ATLTP4.4)	YES	NO	0.238864	0.824248
AT5G41750.2	2.07971	1.03533e-06	Disease resistance protein (TIR-NBS-LRR class) family		YES	NO	-0.655168	0.2602
AT5G41780.1	2.06776	6.5686e-06	myosin heavy chain-like protein		YES	NO	-0.126387	0.927034
AT3G28340.1	2.06623	3.0024e-05	Encodes a protein with putative galacturonosyltransferase activity.	GALACTURONOSYLTRANSFERASE-LIKE 1NA (GATL1NA);GALACTINOL SYNTHASE 8 (GolS8)	YES	NO	-0.606	0.632497
AT3G56410.2	2.05346	1.38173e-06	hypothetical protein (DUF3133)		YES	NO	1.24142	0.23426
AT4G27280.1	2.05309	7.36104e-06	EF-hand Ca2 + -binding protein, which is a Ca2+-dependent transducer of auxin-regulated gene expression and interacts with ICR1.	CA2+-DEPENDENT MODULATOR OF ICR1 (CMI1)	YES	NO	-0.170733	0.453267
AT3G14940.1	2.05294	2.4566e-06	Encodes a cytosolic phosphoenolpyruvate carboxylase (PEPC) that has activity when expressed in E.coli. Its mRNA is most abundantly expressed in roots and siliques. PPC3 belongs to the plant-type PEPC family. It can form an enzymatically active complex with a castor bean ortholog of PPC4, which encodes a bacterial-type PEPC. The mRNA is cell-to-cell mobile.	PHOSPHOENOLPYRUVATE CARBOXYLASE 3 (ATPPC3);PHOSPHOENOLPYRUVATE CARBOXYLASE 3 (PPC3)	YES	NO	-0.757927	0.363496
AT1G55360.1	2.05199	1.22168e-14	tRNA-splicing ligase (DUF239)		YES	NO	-0.012881	0.900726
AT3G10930.1	2.05178	3.78806e-05	Encodes a small secreted signaling peptide that processed both N- and C-terminally after translation and is rapidly induced in response to ROS and flg22-induced stress and may act as a negative modulator of stress-induced ROS signalling.	IDA-LIKE7 (IDL7)	YES	NO	0.34171	0.778725
AT4G27657.1	2.04915	3.76095e-06	hypothetical protein		YES	NO	0.299878	0.77669
AT3G25882.1	2.04901	4.45847e-05	encodes a kinase that physically interacts with NPR1/NIM1	NIM1-INTERACTING 2 (NIMIN-2)	YES	NO	-0.890457	0.460353
AT2G17040.1	2.03782	5.20192e-08	Member of the NAC transcription factor family and more specifically, the ONAC022 subfamily. Involved in leaf and inflorescence stem morphogenesis. The mRNA is cell-to-cell mobile.	NAC DOMAIN CONTAINING PROTEIN 36 (anacNA36);NAC DOMAIN CONTAINING PROTEIN 36 (NAC036)	YES	NO	0.75178	0.58013
AT3G10720.2	2.03536	1.9646e-10	Plant invertase/pectin methylesterase inhibitor superfamily	PECTIN METHYL ESTERASE INHIBITOR-PECTIN METHYLESTERASE 25, PMEI-PME25	YES	NO	0.383029	0.076511
AT3G04640.1	2.03464	1.13204e-05	glycine-rich protein		YES	NO	0.223374	0.502713
AT3G15210.1	2.03405	9.08906e-31	Encodes a member of the ERF (ethylene response factor) subfamily B-1 of ERF/AP2 transcription factor family (ATERF-4). The protein contains one AP2 domain. Acts as a negative regulator of JA-responsive defense gene expression and resistance to the necrotrophic fungal pathogen Fusarium oxysporum and antagonizes JA inhibition of root elongation. The mRNA is cell-to-cell mobile.	ETHYLENE RESPONSIVE ELEMENT BINDING FACTOR 4 (ATERF-4);ETHYLENE RESPONSIVE ELEMENT BINDING FACTOR 4 (ERF4);ETHYLENE RESPONSIVE ELEMENT BINDING FACTOR 4 (ATERF4);RELATED TO AP2 5 (RAP2.5)	YES	NO	0.00737184	0.957444
AT2G28780.1	2.02043	3.8864e-05	P-hydroxybenzoic acid efflux pump subunit		YES	NO	-0.190051	0.88841
AT5G52390.1	2.01717	0.000132245	photoassimilate-responsive protein PAR-like protein	PAR1	YES	NO	0.499278	0.715918
AT3G16720.1	2.00877	5.6294e-08	RING-H2 protein induced after exposure to chitin or inactivated crude cellulase preparations. The mRNA is cell-to-cell mobile.	TOXICOS EN LEVADURA 2 (ATL2);TOXICOS EN LEVADURA 2 (TL2)	YES	NO	0.343269	0.191047
AT2G15220.1	2.00819	0.000107966	Plant basic secretory protein (BSP) family protein		YES	NO	-0.545054	0.668911
AT5G59820.1	2.00278	2.49597e-08	Encodes a zinc finger protein involved in high light and cold acclimation. Overexpression of this putative transcription factor increases the expression level of 9 cold-responsive genes and represses the expression level of 15 cold-responsive genes, including CBF genes. Also, lines overexpressing this gene exhibits a small but reproducible increase in freeze tolerance. Because of the repression o…	(ATZAT12);RESPONSIVE TO HIGH LIGHT 41 (RHL41); (ZAT12)	YES	NO	-0.700183	0.440591
AT5G28020.3	16.767	3.0522e-53	Encodes cysteine synthase CysD2.	CYSTEINE SYNTHASE D2 (ATCYS+A84:I84D2);CYSTEINE SYNTHASE D2 (CYSD2)	NO	NO	0	1
AT3G06130.2	15.4201	1.50572e-50	Heavy metal transport/detoxification superfamily protein	ATHMP25, HEAVY METAL ASSOCIATED PROTEIN 25	NO	NO	0	1
AT3G56980.1	14.2653	6.79532e-58	Encodes a member of the basic helix-loop-helix transcription factor protein.	BASIC HELIX-LOOP-HELIX 39 (BHLH39)	NO	YES	2.85974	0.0217081
AT2G28190.1	11.215	5.52812e-56	Encodes a chloroplastic copper/zinc superoxide dismutase CSD2 that can detoxify superoxide radicals. Its expression is affected by miR398-directed mRNA cleavage. Activation depends totally on CCS. Overexpression of a miR398-resistant form of CSD2 leads to more dramatic improvements in stress (hight light, Cu2+ and methyl viologen) tolerance than overexpression of wild-type CSD2. The mRNA is cell-…	COPPER/ZINC SUPEROXIDE DISMUTASE 2 (CSD2)	NO	NO	4.59822	4.07214e-08
AT2G41240.2	7.79343	7.07122e-28	Encodes a member of the basic helix-loop-helix transcription factor family protein. Functions as a key regulator of iron-deficiency responses independent of the master regulator FIT. Likely regulates genes involved in the distribution of iron within the plant.	BASIC HELIX-LOOP-HELIX PROTEIN 100 (BHLH100)	NO	YES	0	1
AT1G08830.1	7.17839	1.6067e-49	Encodes a cytosolic copper/zinc superoxide dismutase CSD1 that can detoxify superoxide radicals. Its expression is affected by miR398-directed mRNA cleavage. Regulated by biotic and abiotic stress. Activation of CSD1 in the cytoplasm involves both a CCS-dependent and -independent pathway.	SUPEROXIDE DISMUTASE 1 (SOD1);COPPER/ZINC SUPEROXIDE DISMUTASE 1 (CSD1);SUPEROXIDE DISMUTASE 1 (ATSOD1)	NO	NO	3.20194	1.38131e-09
AT1G12520.1	6.72998	4.76155e-27	Copper-zinc superoxide dismutase copper chaperone (delivers copper to the Cu-Zn superoxide dismutase). Localized to the chloroplast. Expressed in roots and shoots. Up-regulated in response to copper and senescence. The AtACC activates all three CuZnSOD activities located in three different subcellular compartments. Contains three domains, central, ATX-1 like and C-terminal. ATX-1 like domain esse…	COPPER CHAPERONE FOR SOD1 (ATCCS);COPPER CHAPERONE FOR SOD1 (CCS)	NO	NO	4.14081	0.011599
AT1G23020.1	4.92771	1.74447e-42	Encodes a ferric chelate reductase whose transcription is regulated by FIT1. Expressed in the root, shoot, flower and cotyledon.	FERRIC REDUCTION OXIDASE 3 (ATFRO3)	NO	YES	0	1
AT1G01520.1	4.18041	6.35814e-22	RVE3 is one of eleven homologous MYB-like transcription factors in Arabidopsis and a member of the RVE8 clade. Plays a minor role in clock regulation.	ALTERED SEED GERMINATION 4 (ASG4);REVEILLE 3 (REV3)	NO	NO	0	1
AT1G21120.1	3.70036	1.9504e-15	O-methyltransferase family protein	INDOLE GLUCOSINOLATE O-METHYLTRANSFERASE 2 (IGMT2)	NO	NO	0	1
AT4G25700.2	3.68642	1.04283e-14	Converts beta-carotene to zeaxanthin via cryptoxanthin.	BETA-HYDROXYLASE 1 (BETA-OHASE 1);BETA CAROTENOID HYDROXYLASE 1 (BCH1); (chy1); (B1)	NO	NO	4.62979	0.0453465
AT1G47405.1	3.6289	7.4383e-12	transposable_element_gene;pseudogene, similar to SAE1-S9-protein, similar to putative non-LTR retroelement reverse transcriptase GB:AAC63678 (Arabidopsis thaliana) from (;(source:TAIR10)		NO	NO	0	1
AT2G16060.1	3.39515	7.26049e-19	Encodes a class 1 nonsymbiotic hemoglobin induced by low oxygen levels with very high oxygen affinity. It is not likely to be a hemoglobin transporter because of its extremely high affinity for oxygen. Overexpression impairs cold stress-induced nitric oxide (NO) production.	HEMOGLOBIN 1 (AHB1)	NO	NO	0	1
AT1G23020.2	3.30531	6.0873e-21	Encodes a ferric chelate reductase whose transcription is regulated by FIT1. Expressed in the root, shoot, flower and cotyledon.	FERRIC REDUCTION OXIDASE 3 (FRO3)	NO	YES	0	1
AT2G02850.1	3.21748	1.56004e-14	Encodes plantacyanin one of blue copper proteins. Involved in anther development and pollination. Expressed in the transmitting tract of the pistil.	PLANTACYANIN (ARPN)	NO	NO	5.81943	0.00264244
AT2G26400.1	3.1059	2.18269e-09	Encodes a protein predicted to belong to the acireductone dioxygenase (ARD/ARD?)family.	ACIREDUCTONE DIOXYGENASE 3 (ARD3);ACIREDUCTONE DIOXYGENASE (ARD);ACIREDUCTONE DIOXYGENASE 3 (ATARD3)	NO	NO	0	1
AT4G08770.1	3.07045	2.86985e-09	Encodes a putative apoplastic peroxidase Prx37. Primarily expressed in the vascular bundles. Overexpression renders a dwarf phenotype with smaller plants and delayed development. Plants overexpressing Prx37 also shows an increase in the amount of esterified phenolic material associated with their walls.	PEROXIDASE 37 (Prx37)	NO	NO	0	1
AT1G69920.1	3.02186	2.33616e-09	Encodes glutathione transferase belonging to the tau class of GSTs. Naming convention according to Wagner et al. (2002).	ARABIDOPSIS THALIANA GLUTATHIONE S-TRANSFERASE TAU 12 (ATGSTU12);GLUTATHIONE S-TRANSFERASE TAU 12 (GSTU12)	NO	NO	0	1
AT5G39150.1	2.95944	2.89779e-09	RmlC-like cupins superfamily protein		NO	NO	0	1
AT2G26010.1	2.80055	2.38813e-08	Predicted to encode a PR (pathogenesis-related) protein. Belongs to the plant defensin (PDF) family with the following members: At1g75830/PDF1.1, At5g44420/PDF1.2a, At2g26020/PDF1.2b, At5g44430/PDF1.2c, At2g26010/PDF1.3, At1g19610/PDF1.4, At1g55010/PDF1.5, At2g02120/PDF2.1, At2g02100/PDF2.2, At2g02130/PDF2.3, At1g61070/PDF2.4, At5g63660/PDF2.5, At2g02140/PDF2.6, At5g38330/PDF3.1 and At4g30070/PDF…	PLANT DEFENSIN 1.3 (PDF1.3)	NO	NO	0	1
AT2G30770.1	2.77052	2.34853e-09	putative cytochrome P450	CYTOCHROME P45NA, FAMILY 71, SUBFAMILY A, POLYPEPTIDE 13 (CYP71A13)	NO	NO	0	1
AT4G37420.1	2.75645	6.43422e-08	glycosyltransferase family protein (DUF23)		NO	NO	0	1
AT3G17690.1	2.72245	2.1227e-08	member of Cyclic nucleotide gated channel family	CYCLIC NUCLEOTIDE-GATED CHANNEL 19 (ATCNGC19);CYCLIC NUCLEOTIDE GATED CHANNEL 19 (CNGC19)	NO	NO	0	1
AT3G05380.1	2.68361	3.5435e-08	ALY2 plays a role in mRNA export and that the efficient nucleocytosolic transport of mRNAs is a requirement for proper plant growth and development.	ALWAYS EARLY 2 (ALY2);ARABIDOPSIS THALIANA ALWAYS EARLY 2 (ATALY2)	NO	NO	0	1
AT1G48490.1	2.61703	3.83279e-09	Protein kinase which together with IREH1 plays an important role in controlling root skewing and maintaining the microtubule network.	INCOMPLETE ROOT HAIR ELONGATION 3 (IRE3)	NO	NO	0	1
AT1G01570.1	2.58056	3.6219e-08	transferring glycosyl group transferase (DUF604)		NO	NO	0	1
AT4G28260.2	2.53778	1.46261e-07	acyl-UDP-N-acetylglucosamine O-acyltransferase		NO	NO	0	1
AT5G44420.1	2.41504	3.29196e-06	Encodes an ethylene- and jasmonate-responsive plant defensin. mRNA levels are not responsive to salicylic acid treatment; although jasmonate and salicylic acid can act synergistically to enhance the expression of this gene. Belongs to the plant defensin (PDF) family with the following members: At1g75830/PDF1.1, At5g44420/PDF1.2a, At2g26020/PDF1.2b, At5g44430/PDF1.2c, At2g26010/PDF1.3, At1g19610/P…	LOW-MOLECULAR-WEIGHT CYSTEINE-RICH 77 (LCR77);PLANT DEFENSIN 1.2A (PDF1.2A);PLANT DEFENSIN 1.2 (PDF1.2)	NO	NO	3.214	0.0439235
AT1G21910.1	2.37635	6.69555e-15	encodes a member of the DREB subfamily A-5 of ERF/AP2 transcription factor family. The protein contains one AP2 domain. There are 15 members in this subfamily including RAP2.1, RAP2.9 and RAP2.10.	DEHYDRATION RESPONSE ELEMENT-BINDING PROTEIN 26 (DREB26)	NO	NO	0.835016	0.00593701
AT2G14230.1	2.35287	5.56269e-06	transposable_element_gene;CACTA-like transposase family (Ptta/En/Spm), has a 2.0e-119 P-value blast match to At5g36655.1/81-333 CACTA-like transposase family (Ptta/En/Spm) (CACTA-element) (Arabidopsis thaliana);(source:TAIR10)		NO	NO	0	1
AT4G32060.2	2.28386	1.75151e-06	Encodes an EF-hand protein with homology to constituents of the mitochondrial Ca2+ uniporter machinery in mammals. MICU binds Ca2+ and localizes to the mitochondria in Arabidopsis. It is a negative regulator of mitochondrial calcium uptake. Mutants display elevated matrix calcium at steady state and modified calcium transient kinetics in vivo.	(MICU)	NO	NO	0	1
AT1G63750.2	2.24199	2.79978e-06	Disease resistance protein (TIR-NBS-LRR class) family, miR825-5p target proposed as a phasiRNA producing locus.		NO	NO	0	1
AT3G43190.1	2.1982	9.57087e-07	Encodes a protein with sucrose synthase activity (SUS4).	SUCROSE SYNTHASE 4 (SUS4);ARABIDOPSIS THALIANA SUCROSE SYNTHASE 4 (ATSUS4)	NO	NO	0	1
AT4G17660.1	2.19663	1.7597e-05	Protein kinase superfamily protein	PBS1-LIKE 2NA (PBL2NA)	NO	NO	0	1
AT5G01210.1	2.19495	2.73969e-06	HXXXD-type acyl-transferase family protein		NO	NO	0.414429	0.0353307
AT4G00440.3	2.19488	9.13093e-09	GPI-anchored adhesin-like protein, putative (DUF3741)	TON1 RECRUITING MOTIF 15 (TRM15)	NO	NO	0	1
AT1G01580.1	2.16058	1.70362e-06	Encodes the low-iron-inducible ferric chelate reductase responsible for reduction of iron at the root surface. It is likely to be the major Fe(III) chelate reductase in Arabidopsis iron metabolism. Coordinately regulated with IRT1, the major transporter responsible for high-affinity iron uptake from the soil, at both transcriptional and posttranscriptional levels. Steady state mRNA levels are reg…	FERRIC REDUCTION OXIDASE 2 (ATFRO2)	NO	YES	0	1
AT3G51670.1	2.13598	9.63133e-19	PATLs belong to a family of proteins having a Golgi dynamics (GOLD) domain in tandem with the Sec14p-like domain. PATLs are auxin regulated. Quadruple mutants (patl2456) show altered PIN1 lateralization in root endodermis cells.	(PATL6)	NO	NO	-0.330287	0.015499
AT3G09940.1	2.1207	3.71172e-05	Encodes a member of the monodehydroascorbate reductase gene family. Critical for a mutualistic symbiosis between the host Arabidopsis and the root colonizing fungus Piriformospora indica.	MONODEHYDROASCORBATE REDUCTASE 2 (MDAR2);MONODEHYDROASCORBATE REDUCTASE 3 (MDAR3); (ATMDAR3);MONODEHYDROASCORBATE REDUCTASE (MDHAR);ARABIDOPSIS THALIANA MONODEHYDROASCORBATE REDUCTASE 3 (MDAR3)	NO	NO	0	1
AT1G13607.1	2.08431	1.80003e-05	Encodes a defensin-like (DEFL) family protein.		NO	NO	0	1
AT2G41100.1	2.04556	2.66373e-05	encodes a calmodulin-like protein, with six potential calcium binding domains. Calcium binding shown by Ca(2+)-specific shift in electrophoretic mobility. Expression induced by touch and darkness. Expression may also be developmentally controlled. Expression in growing regions of roots, vascular tissue, root/shoot junctions, trichomes, branch points of the shoot, and regions of siliques and flowe…	CALMODULIN-LIKE 12 (CML12);TOUCH 3 (TCH3);ARABIDOPSIS THALIANA CALMODULIN LIKE 4 (ATCAL4)	NO	NO	0.828285	0.00125301

## Sheet: -Fe Downreg in Shoots
Transcript ID	Fold Change	P-value	Description	Transcript Name	Rapid responding	Resupply-Plus Fold Change	Resupply-Plus P-value
AT1G34370.3	-7.57756994634732	9.43833e-27	Encodes a putative nuclear Cys(2)His(2)-type zinc finger protein involved in H+ and Al3+ rhizotoxicity. In mutants exposed to aluminum stress, there is no induction of AtALMT1, an malate transporter known to be involved in the mediation of aluminum toxicity. Cell wall of the mutant is unstable in low pH medium (pH 4.5) in low Ca solution. This would mediate Ca-alleviation of low pH stress through…	SENSITIVE TO PROTON RHIZOTOXICITY 1 (STOP1); (ATSTOP1)	YES	7.23736	0.002328
AT5G51720.1	-6.54438274946342	1.29257e-24	Encodes a protein with biochemical, structural, and biophysical characteristics of a NEET protein. It plays a key role in plant development, senescence, reactive oxygen homeostasis, and Fe metabolism.	NEET GROUP PROTEIN (NEET); (AT-NEET)	YES	0.145234	0.737024
AT3G03480.1	-5.38491418572505	8.66451e-23	acetyl CoA:(Z)-3-hexen-1-ol acetyltransferase	ACETYL COA:(Z)-3-HEXEN-1-OL ACETYLTRANSFERASE (CHAT)	YES	-0.383094	0.643714
AT2G36885.1	-4.13470625959431	3.27588e-16	translation initiation factor		YES	0.227896	0.542313
AT5G17170.1	-3.66072850341297	3.74824e-16	rubredoxin family protein	ENHANCER OF SOS3-1 (ENH1)	YES	0.200756	0.435292
AT4G13250.1	-3.56715913558842	4.64212e-34	Encodes a chlorophyll b reductase involved in the degradation of chlorophyll b and LHCII (light harvesting complex II).	NON-YELLOW COLORING 1 (NYC1)	YES	0.0426307	0.760695
AT3G27250.1	-3.51606624227033	7.52095e-12	ABA induced transcription repressor that acts as feedback regulator in ABA signalling.	DIG-LIKE 4 (DIL4)	YES	-0.777173	0.323427
AT1G20630.1	-3.46884163718018	3.98378e-27	Catalyzes the reduction of hydrogen peroxide using heme group as cofactor. Protects cells from toxicity by H2O2.	CATALASE 1 (CAT1)	YES	0.218903	0.198622
AT3G43670.1	-3.46411066028976	1.25222e-12	Copper amine oxidase family protein	COPPER AMINE OXIDASE GAMMA 2 (CUAOGAMMA2)	YES	-0.324169	0.472433
AT4G04770.1	-3.30304615296851	5.30769e-16	Encodes an iron-stimulated ATPase. A member of the NAP subfamily of ABC transporters. Involved in Fe-S cluster assembly. Similar to SufB. Involved in the regulation of iron homeostasis. Able to form homodimers. Interacts with AtNAP7 inside the chloroplast.	ATP-BINDING CASSETTE I8 (ABCI8);ATP BINDING CASSETTE PROTEIN 1 (ABC1);ARABIDOPSIS THALIANA NUCLEOSOME ASSEMBLY PROTEIN 1 (ATNAP1)	YES	0.245511	0.134107
AT1G60950.1	-3.16552163033048	2.58694e-17	encodes a major leaf ferredoxin	(FD2);FERREDOXIN 2 (ATFD2); (FED A)	YES	0.207388	0.296961
AT2G31980.1	-3.0011644083154	6.67127e-10	PHYTOCYSTATIN 2	PHYTOCYSTATIN 2 (AtCYS2);PHYTOCYSTATIN 2 (CYS2)	YES	-0.628374	0.265716
AT2G18050.1	-2.99865508041357	5.31651e-18	encodes a structurally divergent linker histone whose gene expression is induced by dehydration and ABA. The mRNA is cell-to-cell mobile.	HISTONE H1-3 (HIS1-3)	YES	-0.0775049	0.838292
AT3G49160.1	-2.93327957260804	1.25666e-08	Expression of the gene is downregulated in the presence of paraquat, an inducer of photoxidative stress.		YES	-0.0171393	0.980699
AT5G59400.1	-2.81755252660623	2.90407e-10	PGR5-like A protein	PGRL2	YES	0.717606	0.372541
AT2G40300.1	-2.74136620196753	5.58797e-08	Encodes FERRITIN 4, AtFER4. Ferritins are a class of 24-mer multi-meric proteins found in all kingdoms of life. Function as the main iron store in mammals. Evidence suggests that Arabidopsis ferritins are essential to protect cells against oxidative damage, but they do not constitute the major iron pool. Localize to mitochondria. Knock out mutants are not sensitive to abiotic stress.	FERRITIN 4 (FER4);FERRITIN 4 (ATFER4)	YES	0.261976	0.724553
AT3G61070.3	-2.67416357121261	3.99863e-17	member of the peroxin11 (PEX11) gene family, integral to peroxisome membrane, controls peroxisome proliferation.	PEROXIN 11E (PEX11E)	YES	1.21107	0.312266
AT1G29140.1	-2.63732750457746	1.98152e-07	Pollen Ole e 1 allergen and extensin family protein		YES	-1.25138	0.401448
AT3G12570.4	-2.61955022128112	2.86895e-09	FYD	(FYD)	YES	5.81607	0.0240015
AT1G29395.1	-2.5898002482791	8.88368e-09	Integral membrane protein in the inner envelope of chloroplasts. Provide freezing tolerance. Expression is induced by short-term cold-treatment, water deprivation, and abscisic acid treatment. involved in response to salt tolerance	(DEG25);COLD REGULATED 414 THYLAKOID MEMBRANE 1 (COR414-TM1);COLD REGULATED 314 INNER MEMBRANE 1 (COR413IM1);COLD REGULATED 314 THYLAKOID MEMBRANE 1 (COR413-TM1)	YES	-0.0514672	0.851668
AT1G80130.1	-2.47088139703549	6.69671e-07	Tetratricopeptide repeat (TPR)-like superfamily protein		YES	-1.33341	0.243651
AT5G60230.2	-2.42407575047946	2.11499e-06	putative subunit of tRNA splicing endonuclease	SPLICING ENDONUCLEASE 2 (SEN2);SPLICING ENDONUCLEASE 2 (ATSEN2)	YES	-0.818836	0.299108
AT3G61870.1	-2.41315546287849	1.6801e-07	Membrane protein (ECM1) located in chloroplast.	ECM1	YES	0.225527	0.0584419
AT3G47860.1	-2.41226626642347	3.81131e-21	Encodes a chloroplastic lipocalin AtCHL. Located in thylakoid lumen. Involved in the protection of thylakoidal membrane lipids against reactive oxygen species, especially singlet oxygen, produced upon excess light. LCNP is required for sustained photoprotective energy dissipation or NPQ (qH) to occur (PMID:29233855).	CHLOROPLASTIC LIPOCALIN (CHL)	YES	0.205584	0.614946
AT5G14550.2	-2.35483747101933	2.04905e-06	Core-2/I-branching beta-1,6-N-acetylglucosaminyltransferase family protein		YES	-0.566487	0.640774
AT1G64860.1	-2.34397369796965	5.2688e-14	Subunit of chloroplast RNA polymerase, confers the ability to recognize promoter sequences on the core enzyme	(RPOD1); (SIGB);SIGMA FACTOR A (SIGA);RNA POLYMERASE SIGMA SUBUNIT 1 (SIG1);RNAPOLYMERASE SIGMA SUBUNIT 2 (SIG2)	YES	0.085522	0.368668
AT4G36350.1	-2.34232116024642	3.5937e-09	purple acid phosphatase 25	PURPLE ACID PHOSPHATASE 25 (PAP25)	YES	-0.189197	0.908519
AT2G25625.1	-2.33565041282192	8.43877e-09	Histone deacetylase-like protein. Induced by senescence and abiotic stresses.	CHLOROPLAST VESICULATION (CV)	YES	-0.666183	0.359229
AT5G08410.1	-2.30474066079042	9.04485e-15	ferredoxin/thioredoxin reductase subunit A (variable subunit) 2	FERREDOXIN/THIOREDOXIN REDUCTASE SUBUNIT A (VARIABLE SUBUNIT) 2 (FTRA2)	YES	1.22091	0.23426
AT2G46530.1	-2.2745064899809	1.41376e-06	auxin response factor 11	AUXIN RESPONSE FACTOR 11 (ARF11)	YES	-0.383719	0.300312
AT1G32540.1	-2.24008659805757	4.01787e-11	Encodes a protein with 3 plant-specific zinc finger domains that acts as a positive regulator of cell death.	LSD ONE LIKE 1 (LOL1)	YES	0.452519	0.662498
AT5G51010.1	-2.23069654977452	2.61574e-09	Rubredoxin-like superfamily protein		YES	0.384346	0.140547
AT2G26500.1	-2.21630645526789	6.72532e-07	cytochrome b6f complex subunit (petM)	PETM	YES	-0.10102	0.854019
AT4G01985.1	-2.21334055968848	1.97436e-05	hypothetical protein		YES	-0.168882	0.800353
AT4G35010.1	-2.20077499481932	1.97408e-05	putative beta-galactosidase (BGAL11 gene)	BETA-GALACTOSIDASE 11 (BGAL11)	YES	0.483773	0.778727
AT4G25030.1	-2.19596256784282	3.99825e-12	Plastid localized protein of unknown function. Mutants are more susceptible to P. syringae and produce less callose upon infection.	NON HOST RESISTANCE 2B (ATNHR2B)	YES	-0.139565	0.349121
AT3G28840.1	-2.19109738108543	3.37549e-05	hypothetical protein (DUF1216)		YES	-0.64038	0.643299
AT2G05710.1	-2.18045324849178	2.13199e-20	Encodes an aconitase that can catalyze the conversion of citrate to isocitrate through a cis-aconitate intermediate, indicating that it may participate in the TCA cycle and other primary metabolic pathways. The protein is believed to accumulate in the mitochondria and the cytosol. It affects CSD2 (At2g28190 - a superoxide dismutase) transcript levels and may play a role in the response to oxidati…	ACONITASE 3 (ACO3)	YES	-0.117539	0.264411
AT3G28750.1	-2.17133692973292	2.4388e-05	hypothetical protein		YES	-0.965844	0.365014
AT5G59220.1	-2.16542347847099	2.09586e-07	Encodes a member of the PP2C family (Clade A protein phosphatases type 2C). Functions as a negative regulator of osmotic stress and ABA signaling.	SENESCENCE ASSOCIATED GENE 113 (SAG113);HIGHLY ABA-INDUCED PP2C GENE 1 (HAI1)	YES	0.389407	0.806969
AT1G49010.1	-2.15696718968839	3.73635e-06	Duplicated homeodomain-like superfamily protein	(MYBS1)	YES	-0.298544	0.319048
AT2G47820.1	-2.1471391766948	1.55397e-05	arginine-glutamic acid dipeptide repeat protein	SANT3	YES	-0.951968	0.461086
AT3G14440.1	-2.13670210484617	1.25901e-08	Encodes 9-cis-epoxycarotenoid dioxygenase, a key enzyme in the biosynthesis of abscisic acid. Regulated in response to drought and salinity. Expressed in roots, flowers and seeds. Localized to the chloroplast stroma and thylakoid membrane.	SUGAR INSENSITIVE 7 (SIS7);NINE-CIS-EPOXYCAROTENOID DIOXYGENASE 3 (NCED3); (ATNCED3);SALT TOLERANT 1 (STO1)	YES	-0.341006	0.42763
AT5G23980.1	-2.13156466708533	1.43134e-08	Encodes a ferric chelate reductase that is expressed at low levels in roots,shoots and cotyledons, but not flowers. Its transcription is regulated by FIT1.	FERRIC REDUCTION OXIDASE 4 (FRO4); (ATFRO4)	YES	0.240841	0.766938
AT5G61410.2	-2.1305192816021	3.2763e-06	Arabidopsis thaliana ribulose-5-phosphate-3-epimerase mRNA	D-RIBULOSE-5-PHOSPHATE-3-EPIMERASE (RPE);EMBRYO DEFECTIVE 2728 (emb2728)	YES	0.414498	0.271167
AT3G23170.1	-2.12966234597177	3.29229e-07	PRP is a proline/serine rich protein of unknown function. It interacts with defense related MAP kinase MPK6 and others. It's expression is induced by PAMP elicitors. May play a role in response to pathogens.	PROLINE/SERINE-RICH PROTEIN (PRP)	YES	-0.198693	0.666212
AT5G07430.1	-2.12938705620771	1.9183e-05	Pectin lyase-like superfamily protein		YES	-2.60122	0.0751331
AT5G57810.1	-2.127837361629	6.55406e-05	Member of TETRASPANIN family	TETRASPANIN15 (TET15)	YES	-1.22308	0.466737
AT1G68650.1	-2.12170911410482	1.75854e-05	Member of the UPF0016 family of membrane proteins, belongs to the conserved group of Mn/Ca transporters. Might act to fine tune Mn allocation into the endoplasmic reticulum of specific cell types.	PHOTOSYNTHESIS-AFFECTED MUTANT 71 LIKE 5 (PML5)	YES	0.638593	0.609828
AT3G04870.1	-2.09567526557442	2.54603e-05	Involved in the biosynthesis of carotenes and xanthophylls, reduces zeta-carotene to lycopene.	SPONTANEOUS CELL DEATH 1 (SPC1);PIGMENT DEFECTIVE EMBRYO 181 (PDE181);ZETA-CAROTENE DESATURASE (ZDS)	YES	0.163822	0.925759
AT1G63930.1	-2.07470549579745	0.000107574	from the Czech roh meaning corner	FROM THE CZECH 'ROH' MEANING 'CORNER' (ROH1)	YES	0.174326	0.901862
AT2G20750.1	-2.06034853034961	1.0252e-06	member of BETA-EXPANSINS. Naming convention from the Expansin Working Group (Kende et al, 2004. Plant Mol Bio)	(ATHEXP BETA 1.5);EXPANSIN B1 (ATEXPB1);EXPANSIN B1 (EXPB1)	YES	-0.914434	0.599262
AT4G24120.1	-2.05573055574821	2.65632e-07	Member of a small family of oligopeptide transporters similar to the yellow stripe locus of maize (ZmYS1).	YELLOW STRIPE LIKE 1 (YSL1)	YES	0.267289	0.548544
AT1G09750.1	-2.04422518821302	8.50259e-07	Eukaryotic aspartyl protease family protein		YES	-0.0259612	0.866504
AT1G17430.1	-2.04073952624487	1.70306e-06	alpha/beta-Hydrolases superfamily protein		YES	-0.38034	0.503429
AT3G20340.1	-2.02654755302588	0.000147667	Expression of the gene is downregulated in the presence of paraquat, an inducer of photoxidative stress.		YES	-0.0631003	0.941996
AT1G56600.1	-2.02137696750465	5.81338e-06	GolS2 is a galactinol synthase that catalyzes the formation of galactinol from UDP-galactose and myo-inositol. GolS2 transcript levels rise in response to methyl viologen, an oxidative damage-inducing agent. Plants over-expressing GolS2 have increased tolerance to salt, chilling, and high-light stress.	GALACTINOL SYNTHASE 2 (AtGolS2);GALACTINOL SYNTHASE 2 (GolS2)	YES	-0.517953	0.665337
AT1G11210.1	-2.01823935902437	5.06016e-06	cotton fiber protein, putative (DUF761)		YES	-0.785491	0.439879
AT4G35440.1	-2.0174466878862	5.59381e-08	Enclodes a choride channel protein that is localized to the thlakoid membrane.	CHLORIDE CHANNEL E (CLC-E)	YES	6.67705	0.0193734
AT1G68600.1	-2.0146775616043	3.99736e-06	aluminum activated malate transporter family protein		YES	-0.504414	0.0994924
AT2G42530.1	-2.00995834125362	5.61726e-07	Encodes COR15B, a protein that protects chloroplast membranes during freezing.	COLD REGULATED 15B (COR15B)	YES	0.132859	0.753823
AT5G45410.3	-17.5534121351693	3.66407e-56	Plastid localized protein of unknown function. Mutants are more susceptible to P. syringae and produce less callose upon infection.	NON HOST RESISTANCE 2A (ATNHR2A)	NO	0	1
AT4G25100.2	-14.5357754222891	5.39002e-157	Fe-superoxide dismutase	FE SUPEROXIDE DISMUTASE 1 (FSD1)	NO	-1.989	9.86316e-06
AT1G58290.1	-3.29249470390327	1.51567e-13	Encodes a protein with glutamyl-tRNA reductase (GluTR) activity, catalyzing the NADPH-dependent reduction of Glu-tRNA(Glu) to glutamate 1-semialdehyde (GSA) with the release of free tRNA(Glu). It is involved in the early steps of chlorophyll biosynthesis.	ARABIDOPSIS THALIANA HEMA 1 (AtHEMA1)	NO	0.28598	0.0271127
AT5G14565.1	-3.29100719358652	9.23081e-11	Encodes a microRNA that targets both CSD and CytC oxidase family members. MicroRNAs are regulatory RNAs with a mature length of ~21-nucleotides that are processed from hairpin precursors by Dicer-like enzymes. MicroRNAs can negatively regulate gene expression by attenuating translation or by directing mRNA cleavage.Mature sequence: UGUGUUCUCAGGUCACCCCUG. Down-regulated by biotic and abiotic stres…	MICRORNA398C (MIR398C)	NO
AT3G08770.2	-2.97001548590969	7.80418e-09	Predicted to encode a PR (pathogenesis-related) protein. Belongs to the lipid transfer protein (PR-14) family with the following members: At2g38540/LTP1, At2g38530/LTP2, At5g59320/LTP3, At5g59310/LTP4, At3g51600/LTP5, At3g08770/LTP6, At2g15050/LTP7, At2g18370/LTP8, At2g15325/LTP9, At5g01870/LTP10, At4g33355/LTP11, At3g51590/LTP12, At5g44265/LTP13, At5g62065/LTP14, At4g08530/LTP15.	(ATLTPI-6);LIPID TRANSFER PROTEIN 6 (LTP6)	NO	0	1
AT4G08390.3	-2.93971233686829	1.85821e-09	Encodes a chloroplastic stromal ascorbate peroxidase sAPX. Ascorbate peroxidases are enzymes that scavenge hydrogen peroxide in plant cells. Eight types of APX have been described for Arabidopsis: three cytosolic (APX1, APX2, APX6), two chloroplastic types (stromal sAPX, thylakoid tAPX), and three microsomal (APX3, APX4, APX5) isoforms. The mRNA is cell-to-cell mobile.	STROMAL ASCORBATE PEROXIDASE (SAPX)	NO	0	1
AT2G25625.2	-2.93021853036204	1.64557e-12	Histone deacetylase-like protein. Induced by senescence and abiotic stresses.	CHLOROPLAST VESICULATION (CV)	NO	-6.11814	0.0207872
AT1G80660.2	-2.61497297830039	5.23283e-08	H[+]-ATPase 9	H(+)-ATPASE 9 (HA9)	NO	-3.83899	0.0410654
AT4G36050.2	-2.55554944399359	4.35561e-08	Encodes a base excision repair protein with 3'-phosphatase activity and strong 3'-5' exonuclease activity. Together with ZDP, it plays overlapping roles in the maintenance of epigenome and genome stability in plants.	APURINIC/APYRIMIDINIC ENDONUCLEASE2 (APE2)	NO	0	1
AT1G68140.2	-2.46694456234182	1.8236e-06	zinc finger/BTB domain protein, putative (DUF1644)		NO	-5.74049	0.0236444
AT1G53910.3	-2.42827625064935	2.53457e-06	Encodes a member of the ERF (ethylene response factor) subfamily B-2 of ERF/AP2 transcription factor family (RAP2.12). The protein contains one AP2 domain. There are 5 members in this subfamily including RAP2.2 AND RAP2.12. Involved in oxygen sensing. It plays a key role in controlling root bending in response to hypoxia.	ETHYLENE RESPONSE FACTOR 74 (ERF74);RELATED TO AP2 12 (RAP2.12)	NO	-5.59144	0.0371272
AT2G47015.1	-2.40072095983868	1.89463e-06	Encodes a microRNA that targets both a Laccase and Plantacyanin-like family member. MicroRNAs are regulatory RNAs with a mature length of ~21-nucleotides that are processed from hairpin precursors by Dicer-like enzymes. MicroRNAs can negatively regulate gene expression by attenuating translation or by directing mRNA cleavage.Mature sequence: AUGCACUGCCUCUUCCCUGGC	MICRORNA408 (MIR408)	NO
AT1G20620.2	-2.33956530379806	1.20035e-06	Catalase, catalyzes the breakdown of hydrogen peroxide (H2O2) into water and oxygen. The mRNA is cell-to-cell mobile.	REPRESSOR OF GSNOR1 (ROG1);CATALASE 3 (CAT3);SENESCENCE 2 (SEN2); (ATCAT3)	NO	-8.14053	0.0208307
AT4G25100.1	-2.26354679182505	1.70342e-06	Fe-superoxide dismutase	FE SUPEROXIDE DISMUTASE 1 (FSD1)	NO	-1.65422	0.000805567
AT3G13784.1	-2.2295254805257	2.28757e-05	cell wall invertase 5	CELL WALL INVERTASE 5 (AtcwINV5);CELL WALL INVERTASE 5 (CWINV5)	NO	0	1
AT5G44440.1	-2.22418162530906	2.07653e-05	FAD-binding Berberine family protein	ATBBE28	NO	0	1
AT4G13554.1	-2.18768664143093	8.68477e-06	Encodes a microRNA that targets a Laccase family member. MicroRNAs are regulatory RNAs with a mature length of ~21-nucleotides that are processed from hairpin precursors by Dicer-like enzymes. MicroRNAs can negatively regulate gene expression by attenuating translation or by directing mRNA cleavage. Mature sequence: UUUUGUAUGUUGAAGGUGUAU	MICRORNA857A (MIR857A)	NO
AT4G13030.2	-2.16200045438717	4.73518e-05	P-loop containing nucleoside triphosphate hydrolases superfamily protein		NO	0	1
AT5G19580.1	-2.12405203431983	1.82678e-05	glyoxal oxidase-related protein	GALACTOSE OXIDASE-LIKE 6, GOXL6	NO	-1.03524	0.0253861
AT1G67195.2	-2.12040221708023	6.78658e-05	miRNA (MIR414). Has been identified as a translated small open reading frame by ribosome profiling.	MIR414	NO
AT2G16750.1	-2.1018484361107	8.3577e-07	kinase with adenine nucleotide alpha hydrolases-like domain-containing protein		NO	0	1
AT5G18000.1	-2.06142265120457	9.70577e-05	Encodes VERDANDI (VDD), a putative transcription factor belonging to the reproductive meristem (REM) family. VDD is a direct target of the MADS domain ovule identity complex. Mutation in VDD affects embryo sac differentiation.	VERDANDI (VDD)	NO	-3.36144	0.0458339
AT5G15970.1	-2.00365475650738	2.42011e-08	Encodes a gene that can be induced by cold and abscisic acid and may be involved in cold acclimation and salt tolerance. The mRNA is cell-to-cell mobile.	(AtCor6.6); (KIN2);COLD-RESPONSIVE 6.6 (COR6.6)	NO	-0.35735	0.0193092
AT3G01810.3	-2.001714045862	0.000234524	EEIG1/EHBP1 protein amino-terminal domain protein		NO	-5.29782	0.0268045
